# 1 Impact of lock down relaxation on the COVID-19 epidemic 2 trajectory in Bangladesh

3 Shafiun Nahin Shimul, PhD<sup>1</sup>,

4 Mofakhar Hussain, PhD<sup>2</sup>

5 Dr. Abu Jamil Faisel, MPH<sup>3</sup>,

6 Syed Abdul Hamid, PhD<sup>1</sup>

## 7 8 Abstract

9 In this projection exercise, we analyzed the circumstances of the COVID-19 pandemic in  
10 Bangladesh and used multiple methods to characterize the epidemic curve. We merged several  
11 publicly available data sets for the purpose. Projections using actual Government data as of June  
12 16, 2020 reveals that the epidemic curve for Bangladesh may be different from that of developed  
13 countries and quite similar to such curves in countries in the region. This is true, both in terms of  
14 incidence of cases (total number of cases per million population) and length of the epidemic  
15 (months to peak or flatten the epidemic curve). We find that while Bangladesh went into  
16 lockdown early, efforts to maintain lockdown at a national level was relaxed and new cases  
17 accelerated; with significant growth happening since lifting of lockdown on May 31. Our  
18 estimates indicate prevalence of COVID-19 may be between 200,000 and 600,000 towards end  
19 of the year, may take 9 months (270 days) to flatten the epidemic curve, lifting of the lockdown  
20 may have increased total cases by 60 to 100% and may have prolonged the epidemic by  
21 additional 2-3 months.

22  
23  
24  
25 1: Institute of Health Economics, University of Dhaka

26 2: Institute of Health of Health Policy and Management, University of Toronto

27 3: Public Health Expert Advisor, DGHS, MOHFW

28

## 29 **Introduction**

30 Coronavirus (COVID-19) is a new strain from the coronavirus family and was first  
31 detected in the Wuhan province, China, in December, 2019. By mid-February, 20,000 infected  
32 cases were found in China and by beginning of March, about 80,000 were infected with about  
33 4,000 deaths. By early March, about 20,000 people in Europe were infected with about 1,000  
34 deaths. On January 30 the World Health Organization (WHO) declared COVID-19 as a Public  
35 Health Emergency and then on March 11, WHO declared COVID-19 as a global pandemic. (1)

36 Researchers have determined that COVID-19 is a highly infectious virus that may spread  
37 person to person in multiple ways(2) and the rate of transmission often represented by the  
38 reproductive number or  $R_0$  was estimated to be higher than known infectious virus (2). It was  
39 also found that 1-6% of those infected may die (3). As of the writing of this paper there is no  
40 cure or vaccination for COVID-19.

41 Since the early days of the COVID-19 pandemic, researchers have warned that unless  
42 mitigated, the dramatic increase in infected cases may overwhelm health systems. Thus, it  
43 became critical that estimation exercise of the potential number of cases be undertaken for  
44 Bangladesh, to inform timing and levels of potential cases. This paper reviews the current status  
45 of COVID-19 pandemic in Bangladesh, discusses different policies undertaken to mitigate the  
46 spread, evaluates and estimates total spread of COVID-19 cases in Bangladesh using multiple  
47 methods.

48

## 49 **Background**

50 Disease dynamics of COVID-19 indicate that transmission may happen from droplets to  
51 nose and eyes and may go from infected person to surface or to other persons (2). Once a person  
52 is infected, there is an incubation period where infected person does not show any symptoms.  
53 This incubation period may be between 5 and 14 days. However, the infected person, who does  
54 not have symptoms, may be able to transmit the virus (4). Hence, while symptomatic persons  
55 may infect others, it is also possible infected asymptomatic persons may also spread the disease  
56 (5). It is for these reasons that face masks, hand washing hygiene and social distancing has  
57 become so important in containing the spread of the disease.

58 Most infected with COVID-19 do not show any symptoms and those that do have fever,  
59 cough, fatigue, slight dyspnoea, sore throat, headache and conjunctivitis (4). The course of the  
60 infection is mild for most infected; thus 80-90% recover without any serious impacts; however,  
61 about 10% may have trouble breathing and low blood oxygen level and require hospitalization.  
62 A further 5% may experience life threatening condition such as respiratory failure and multi-  
63 organ failure. Thus, case fatality rate, defined as percentage of infected patients who may die, for  
64 COVID-19 range from 2-5% and this percentage increases with age and for those with chronic  
65 comorbid conditions such as diabetes, asthma and heart disease. Thus spread of COVID-19 in  
66 Bangladesh poses a significant threat; and without active intervention by Government, even if a  
67 small percentage of the population, say 5%, are infected, this translates to 8,000,000 needing  
68 hospitalization and over 200,000 deaths.

69 Observing the spread and potential significant health effects, many researchers estimated  
70 potential impact of COVID-19 pandemic to help policy makers prepare respective countries and  
71 their systems to face this pandemic. The main thrust of these estimations has been to encourage  
72 policy makers to implement strong Non-Pharmaceutical Intervention (NPI) such as social  
73 distancing, hand hygiene and wearing of face masks, self quarantining, all to reduce the potential  
74 spread of the pandemic (6). Research has also found that testing and isolating or quarantining  
75 infected persons may mitigate the spread of the infection (7).

76 These estimations use epidemiologic models such as the Suspected-Infected-Recovery  
77 (SIR) model to project the number of infected cases, number of deaths and potential demand for  
78 health care, specially hospital ICU use during times of the peak of pandemic (8). Subsequent  
79 studies focused on the impact of NPI on the spread of the disease. One such study was by  
80 Ferguson et al. published on March 16, 2020 (9). Without strong NPI, the study estimated that  
81  $R_0$ , which is a measure of rate of infection transmission, could be about 2.4 and about 80% of the  
82 population would be infected in UK and US and about 2.2M people would die in USA alone.  
83 With NPI and other mitigation efforts, the study noted that health care system would be  
84 overwhelmed and deaths in US would reach about 1.1M to 1.2M people. Less than two weeks  
85 later, a study by Murray et al (10) predicted that even with strong NPI estimated deaths over a 4-  
86 month period would be about 81,000 in the US. A Canadian study estimated initial infection rate  
87 of 56% in Ontario, Canada and NPI could reduce that infection rate to 2%(11). A recent

88 European study estimated initial reproduction number for COVID-19 is 3.8 and NPI has had  
89 significant impact on the spread of the disease resulting in reproduction number of less than 1 at  
90 0.86 and final infection rate of about 3.2-4% of the population (12).

91 In the context of Bangladesh, the first COVID-19 case was identified on March 9 and by  
92 March 23, 2020 total cases reached 33. It is at that point that the government of Bangladesh  
93 announced shutdown<sup>1</sup> of public, private offices, schools and colleges from March 26,2020 for 10  
94 days (15). Subsequently all public transport systems were shut down (16). Police, the Army and  
95 other security forces were deployed to enforce social distancing. Announcement of the initial  
96 lockdown, in the form of a general holiday, for 10 days was followed by multiple extensions.  
97 Since the announcement on March 24, 2020, there have been several occasions where there have  
98 been relaxation of lockdown including allowing garments workers to join work(17), allowing  
99 stores to open and relaxation of travel during Eid religious holiday(18). Finally, the Government  
100 announced that all general holiday will end on May 30 and work and travel can resume on May  
101 31; however, there would be a strict enforcement of NPI such as social distancing, and  
102 vulnerable population such as the elderly, pregnant women and those with multiple chronic  
103 diseases are discouraged to re-join their workplace. Schools and colleges were to remain closed.

104 In the mean time the Government has attempted to increase capacity of the health care  
105 system, including increased number of COVID-19 testing sites from 2 to more than 50 (19),  
106 testing about 15,000 a day; recruitment of 2,000 new doctors and 6,000 nurses (20) and opening  
107 2000+ beds field hospitals (21).

108 In the second week of May, cyclone Amphan, with a land speed of 185km/h, made land  
109 fall in the coastal region of Bangladesh. The cyclone left a trail of destruction including 28  
110 deaths, destructions of 200,000 homes and damage to about 200 bridges and culverts (21).

111 To mitigate economic impact of the pandemic and subsequent cyclone, the Government  
112 has implemented multiple stimulus packages targeted at workers, small and large business,  
113 garments and agricultural sectors, low income/informal workers and those affected by cyclone

---

<sup>1</sup> The government declared a general holiday/ leave instead of calling it 'lockdown' or 'shutdown'. However the objectives were the same—to tame the spread of the virus.

114 Amphan. The Asian Development Fund (ADB), the International Monetary Fund (IMF) and the  
115 World Bank has pledged aid and loan (23) to support Bangladesh in this crisis.

116 Studies on Bangladesh specific COVID-19 models estimated that by end of May, 2020  
117 about 89 million may be infected and total deaths could be 500,000.(13). Another study  
118 estimated that without NPI, daily new cases at peak of the epidemic would be nine Million and  
119 deaths over 18 months would be over 200,000 and with NPI, new daily peak would be 36,000  
120 and cumulative deaths would be about 5,000 (14).

121 Although studies have attempted to understand the impact of various interventions and  
122 project cases using real data and established models, there has not been any study of COVID-19  
123 projections for Bangladesh that estimates impact of policy changes using multiple models. .

124 In light of these events, in this paper we attempt to estimate the epidemic curve for  
125 Bangladesh under alternative scenarios using multiple methods. Pre-post analysis is done to  
126 evaluate impact of the lifting of the lockdown on May 31. The significant contribution of this  
127 paper is to apply models from diverse fields: epidemiology, econometrics, and data analytics  
128 (machine learning tools) which allowed us to capitalize the strength of various fields. Since there  
129 is an insurmountable amount of unknown that follow COVID-19, using various tools can provide  
130 a stronger prediction. This paper uses actuals figures as of June 16,2020 obtained from IEDCR,  
131 official Government authority to provide COVID-19 data. At the time, about 100 days had  
132 passed since the first case and total number of infected cases in Bangladesh was about 90,000.

133

### 134 **Methodology.**

135

136 As noted before researchers employ standard epi models to predict levels of infections in  
137 a pandemic. However due to lack of Bangladesh specific parameter data on contact and  
138 transmission rates and significant measurement issues with available data, standard method of  
139 SIR may not be sufficient for projecting cases in Bangladesh. Second, unknown characteristics  
140 of COVID-19 creates substantial uncertainty and finally changing nature of the NPI in  
141 Bangladesh since the beginning of the epidemic requires multiple approaches to projecting cases.

142

### 143 **The SIR method:**

144 One method is the Susceptible-Infected-Recovered (SIR) model developed by Kermack,  
145 and McKendrick (24). The model uses parameters of incidence, transmissibility, duration of  
146 infections and recovery/deaths to estimate trajectory of incidence of infection and deaths over  
147 time. Note recovery here means those who have recovered or died as result of the infection and  
148 are removed from those who are susceptible.

149 The SIR model is used to estimate rates of infections for highly infectious disease. Often  
150 termed as compartmental model, the model relates changes in suspected case (S), infected cases  
151 (I) and recovered or death (R ) via 3 differential equations as shown below:

152 
$$\frac{dS}{dt} = -rSI \tag{1}$$

153 
$$\frac{dI}{dt} = rSI - aI \tag{2}$$

154 
$$\frac{dR}{dt} = aI \tag{3}$$

155 where r represent transmission rate and a represent rate of recovery or death among  
156 infected. Note R+S+ I= population, which is assumed to be constant and for Bangladesh it is  
157 assumed to be 161 Million.

158 Equation (1) describes change in suspected cases is inversely related to rate of contact  
159 ( S\*I) and rate of transmission; equation (2) describes change in infected cases depends on  
160 number of newly infected (rSI) minus number of cases infected that are removed aI ; equation  
161 (3) describes change in recovery or death depends on rate of recovery (a) and number of  
162 infected cases I.

163 Equation (2), can be rearranged to represent  $R_0 = r S/a$ , where r/a represent contact ratio  
164 or fraction of the population that comes in contact with persons who are infected during the  
165 period of the epidemic and  $R_0$  reproduction number.  $R_0$  value of greater than 1 represents a  
166 epidemic as number of newly infected will be greater than number of currently infected.

167 Challenges with the SIR model is that all parameters are subject to local conditions; so,  
168 contact rate may be affected by labour market decisions of individuals, recovery rate may be

169 affected by availability of local hospital capacity etc. These conditions vary widely country to  
170 country.

171 Variation of the SIR model was developed by Battista (25) and it is that model that is  
172 used in this study.

### 173 **The Gompertz method**

174 A method to simulate the expected exponential growth of COVID-19 cases in a S-  
175 shaped curve can also be estimated using a Gompertz. The simplest form of the Gompertz  
176 curve can be expressed as:

$$177 \quad CI_t = ae^{-e^{b(t-t_0)}} \quad (4)$$

178  $CI_t$  is the cumulative cases at time  $t$ ,  $a$  is the projected number of maximum cases,  $b$  is  
179 the growth rate of infection,  $t_0$  is the start date. The cumulative cases are driven by the three  
180 parameters;  $a$ ,  $b$  and  $t_0$  and using regression techniques these may be estimated.

181 Gompertz curve has been previously used to estimate patterns of human height  
182 growth as well as spread of an epidemic (26,27,28). The main advantage of using Gompertz  
183 distribution is that it allows having a longer tail which is a likely case for COVID-19. In  
184 addition, this distribution is flexible in parameters compared to say logistic and exponential  
185 models.

### 186 **The Quadratic Method**

187 This approach is to fit actual data to a quadratic (parabolic) function that reflects the  
188 epidemic curve observed in countries that have experienced the COVID-19 pandemic over a  
189 given number of days. The first incidence in Bangladesh was in March 8, full 3 months after the  
190 first incidence in China. That means daily data was available for all countries for 90+ days to  
191 analyze experience in other countries with the virus.

192 The approach is to use estimation of new case count based on quadratic function  
193 where the dependent variable is a function of square of the dependant variable. Using this  
194 approach, number of new infections in a country  $i$  at time  $t$  after  $x$  days of the onset of the  
195 infection can be estimated using the following formulae.

$$196 \quad I_{it} = ax_{it} + bx_{it}^2 + c \quad (5)$$

197 In this model, number of daily cases in a country is assumed to depend on the number of  
198 days since COVID-19 cases reached 100 ( $x$ ) and its squared value. It is assumed that  $x$  capture  
199 epidemics measures such as contact rates and transmissions rates and its square values assumes  
200 the epidemic will peak in a country after certain days in the country. It is also important to note  
201 maximum level of  $I$  when the first differential of equation 4 is set to zero and maximum value  
202 of  $x$  is reached when  $\hat{x} = -a/2b$ . A useful aspect of this method is that it allows us to change  
203 the values of  $a$  or  $b$  to decrease or increase the days over which the epidemic will reach a peak.  
204 Thus higher values of  $a$  or lower values of  $b$  will increase the days to peak of the epidemic.  
205 These adjustments to parameters may be informed by evidence of impact of NPI or lack there of.

206 Using regression methods, parameters  $a$ ,  $b$  and  $c$  can be estimated and these parameters  
207 can then be applied to futures  $x$  for specific country to calculate  $I$  for the future.

208

### 209 **The Facebook Prophet method:**

210 Another method is an open sourced time series forecasting tool developed by Facebook  
211 known as Prophet (29). This platform has previously been used in COVID-19 (30). The  
212 algorithm automatically selects changes in data points, runs piecewise linear or logistic  
213 regressions accounting for variations in data due to various events, say weekdays. Another  
214 advantage of this tool is that it can capture recent changes and can provide better forecast taking  
215 both old and relatively newer growths. This tool has been extremely popular among the data  
216 scientists and machine learning experts, and some famous machine learning sites provide  
217 projections using this tools, such as in Katana ML firm (<https://katanaml.io/>). The prophet model  
218 can be run using R or python. We applied python fbprophet library to produce our results.

### 219 **Pre-Post Analysis:**

220 Although recommended approach to manage a pandemic is to implement NPI strategies  
221 until pandemic has reached a peak, many developing countries do not have the economic  
222 capacity to sustain strong NPI measures for a lengthy period across the country. As a result,  
223 many countries are forced to relax their respective NPI enforcement even when daily cases have



224 not peaked. Bangladesh is one such country where NPI strategy was lifted on the 99th day since  
225 the first case, even though new case counts were on the rise.

226 Since each of these models are based on actuals as of a specific date, estimation based on  
227 two different times can be used to evaluate impact of NPI policy pre and post lifting of NPI.

228 Thus impact lifting of NPI is  $D_i$  for country  $i$  can be calculated as

$$229 \quad \sum D_t = \sum_{i=t}^T \tilde{I}_i - \sum_{i=ts}^T \tilde{I}_i \quad (6)$$

230 Assume NPI was relaxed on date  $t$  and current date is  $ts$ , where  $ts$  is greater than  $t$ ,  $T$  is  
231 the when total cases reaches a peak (new cases approach zero) then impact of NPI is estimated  
232 to be the difference in projected total case using actuals as of date  $t$  versus actuals as of  $ts$ . In  
233 such as case,  $\tilde{I}_i$  is the actual or estimated incidence of total cases at time  $i$ ,  $ts$  is the date on  
234 which NPI was implemented and  $t$  is the date of the most recent actuals and  $T$  is the final date of  
235 the of the projection period. Note that  $t$  is greater than  $ts$ .

#### 236 **Data.**

237 Country level annual demographic, health care related data and income was obtained  
238 from World Bank's 'Health and Nutrition Program' data (31) and data included percentage of  
239 population over 65, percentage of GDP spent of health care, life expectancy at birth; per-capita  
240 income at purchasing power parity (PPP) was used as per-capita income data. All data points  
241 from the World Banks was for 2016. To compare Bangladesh with other countries  
242 categorization was necessary and one categorization developed was per-capita income. With this  
243 categorization Bangladesh can be compared with other countries of similar per-capita income.  
244 For this approach, countries are ranked according to per-capita income, and all countries were  
245 grouped into 5 buckets (quintiles); such that about 20% of the bottom per-capita income  
246 countries are put in group 1, 20% of subsequent ranked per-capita income countries are put in  
247 group 2 and so on.

248 Another categorization was done to compare Bangladesh to others in the region. It was  
249 assumed other countries in the region may have similar demographics, per-capita income, health  
250 care capacity as a result managing COVID-19 may pose the same challenges and result in similar  
251 outcome. Thus India, Pakistan, Vietnam, Thailand, Philippines, Nepal, Bhutan, Indonesia,  
252 Malaysia, Sri Lanka were included in this category.

253 Country level COVID-19 related daily data was obtained from three different sources.  
254 Europeans Union’s European Centre for Disease Prevention and Control (ECDPC) data provides  
255 country level daily cases and deaths for COVID-19 (32). The country specific daily test data was  
256 downloaded from the “github” site(33). Country specific daily reduction in cell phone traffic was  
257 downloaded from Google mobility (34). Google publishes data on location specific mobility data  
258 by type of location for each country and by date. The report shows percentage change in cell  
259 phone traffic in a given location in a country or region for a given date compared to a baseline of  
260 Jan-3 to Feb-4 of 2020. The location identified include retail, grocery, parks, transit, workplace  
261 and residential. Review of the mobility data for Bangladesh showed that data for parks and  
262 grocery were varying during the lock down period, workplace data was deemed to not reliable as  
263 significant portion of the working population is in the informal sector (thus no specific  
264 workplace location) ; finally trends in transit and retail data were the same. Thus for the purpose  
265 of this study we use changes in cell phone traffic in transit location in Bangladesh. It is assumed  
266 this trend reflects changes in social distancing and other NPI, where lower levels (higher  
267 negative levels) reflect stronger social distancing and vice versa.

268 Country level daily data from these 3 sources and annual figures was then merged to  
269 create a single data set for this study.

270

## 271 **Results.**

272 For comparative purpose, we pursue a cohort type analysis where we compare measures  
273 for Bangladesh to similar measures of other selected countries where all countries were in the  
274 99<sup>th</sup> day of their respective COVID-19 epidemic.

275 There about 100 countries selected for comparison. The category created to represent  
276 countries per-capita income is INC\_RNK\_CAT. The data shows Bangladesh is in  
277 INC\_RNK\_CAT =1 among all the countries ranked by Per Capita Income. All measures are  
278 reported as median in their respective group. Bangladesh has lower spending on health than its  
279 comparators (2.5% vs 5.5%), however in terms of life expectancy, Bangladesh does better (71.8  
280 vs 62.7). Age distribution data shows Bangladesh has more elderly as % of all population  
281 compared to its cohort; however this percentage is lower in Bangladesh than other countries with  
282 higher per capita income.

283 **Table 1A: Comparison of Bangladesh with other countries ranked by Per Capita Income**  
 284 **As of the 99<sup>th</sup> day from first case date.**

| Rank              | Country    | Median            | % GDP     | Life       | Pop % | COVID-19 Measures |                    |       |        |       |
|-------------------|------------|-------------------|-----------|------------|-------|-------------------|--------------------|-------|--------|-------|
|                   |            |                   |           |            |       | Transit           | Per                |       |        | Case  |
|                   |            |                   |           |            |       |                   | Million Population |       |        |       |
| Per Capita Income | Count      | Per Capita Income | On Health | Expectancy | 65+   | % Decr            | Test               | Cases | Deaths | Rate  |
|                   |            |                   |           |            |       | From              | Base               |       |        |       |
| 1                 | Bangladesh | \$3,697           | 2.40%     | 71.8       | 5.10% | -37%              | 93                 | 562   | 7.96   | 1.30% |
| 1                 | 9          | \$3,547           | 5.50%     | 62.7       | 3.10% | -37%              | 85                 | 285   | 3.28   | 1.30% |
| 2                 | 17         | \$9,093           | 5.80%     | 71.5       | 6.50% | -50%              | 123                | 169   | 5.83   | 2.80% |
| 3                 | 23         | \$15,520          | 6.90%     | 75.8       | 8.30% | -51%              | 247                | 900   | 24.77  | 2.80% |
| 4                 | 22         | \$30,978          | 7.20%     | 77.4       | 19%   | -26%              | 613                | 725   | 28.16  | 3.90% |
| 5                 | 24         | \$51,574          | 9.60%     | 81.4       | 16%   | -46%              | 987                | 2,885 | 80.05  | 4.10% |

285  
 286 . These aggregate measures appear to show as per capita income increases, countries  
 287 tend to spend more of their income on health, they appear to have higher life expectancy and as a  
 288 result percentage of the elderly population increases.

289 COVID-19 related measures show that transit mobility has decreased by 37% as of June  
 290 16 in Bangladesh compared to baseline mobility of January/February,2020. This is within range  
 291 of the same measure of other countries; however other countries may have different epidemic  
 292 experience and thus the decline will need to be evaluated in the context of experience of each  
 293 country. Tests per million population show Bangladesh has higher rates compared to it  
 294 cohort( 93 vs 85) and lower than rates in higher income countries. COVID-19 total cases per  
 295 million for Bangladesh appear to be significantly higher than its cohort countries (562 vs 285) ;  
 296 note this is measured 100 days after the date of the first case for all countries. Thus Bangladesh  
 297 appear to have much higher rate of infection compared to other countries in same income groups.  
 298 For deaths per million, rates for Bangladesh is higher than its cohorts and in terms of case fatality  
 299 (which equals total deaths divided by total infected), rates for Bangladesh is comparable to its  
 300 cohort.

301 Compared to high income countries, Bangladesh appear to have lower cases per million;  
 302 this may be a reflection of lower levels of testing or other factors. WHO has provided guidance  
 303 on testing which is based on test positivity rate. The positivity rate is the ratio of the number of  
 304 people who test positive for COVID-19 to all those who are tested. As testing programs scale up,  
 305 the number of tests go up and if the virus is contained or on its way to be contained, the number

306 of people testing positive go down, thus the positivity rate is expected to go down. WHO has  
 307 advised that testing programs should try to test such that positivity rate is between 3 and 12%.  
 308 Currently, In Bangladesh, the positivity rate has been about 20%. Thus in Bangladesh testing  
 309 may need to be at-least doubles to reduce positivity rate. There could be other reasons that results  
 310 in lower cases in Bangladesh which may include levels of infection spread and different levels of  
 311 immunity to the virus.

312 Higher income countries appear to have higher levels of testing, levels of cases and  
 313 deaths and higher levels of case fatality. High case fatality in high income countries could be  
 314 explained by the fact that these countries have more elderly population and more of the elderly  
 315 population are institutionalized. A single outbreak in one of these institutions, which typically  
 316 houses 100-200 seniors, may result in significant outbreak and a large number may of the seniors  
 317 may not survive. Thus recent evidence show that most of the elderly deaths (those 65 years or  
 318 older) were not in the community but in long-term care facilities. About 80% of the deaths in  
 319 Canada and 40% of the deaths in USA were in long-term care facilities (39).

320 **Table 1B: Comparison of Bangladesh with other countries in the region.**  
 321 **As of the 99th day from first case date.**

| Rank              | Country     | Median            | % GDP     | Life       | Pop % | COVID-19 Measures |                      |       |        | Case  |          |
|-------------------|-------------|-------------------|-----------|------------|-------|-------------------|----------------------|-------|--------|-------|----------|
|                   |             |                   |           |            |       | Trans it          | Per                  |       |        |       | Fatality |
|                   |             |                   |           |            |       |                   | Millio n Po pulation |       |        |       |          |
| Per Capita Income | Count       | Per Capita Income | On Health | Expectancy | 65+   | % Dec r           | Test                 | Cases | Deaths | Rate  |          |
| 1                 | Bangladesh  | \$3,697           | 2.40%     | 71.8       | 5.10% | -37%              | 93                   | 562   | 7.96   | 1.30% |          |
| 1                 | Cambodia    | \$3,743           | 6.10%     | 69.0       | 4.30% | -48%              | .                    | 8     | -      | 0.00% |          |
| 1                 | Nepal       | \$2,642           | 6.30%     | 69.8       | 5.60% | -66%              | 12                   | 2     | -      | 0.00% |          |
| 1                 | Pakistan    | \$4,976           | 2.80%     | 66.8       | 4.30% | -28%              | 107                  | 421   | 9.30   | 2.00% |          |
| 2                 | India       | \$6,635           | 3.70%     | 68.9       | 5.80% | -56%              | 59                   | 42    | 1.55   | 3.30% |          |
| 2                 | Indonesia   | \$11,605          | 3.10%     | 71.0       | 5.50% | -44%              | 27                   | 120   | 7.27   | 5.80% |          |
| 2                 | Philippines | \$7,784           | 4.40%     | 70.8       | 4.80% | -78%              | 49                   | 97    | 6.93   | 6.70% |          |
| 2                 | Vietnam     | \$6,365           | 5.70%     | 75.2       | 6.80% | -20%              | 683                  | 3     | -      | 0.00% |          |
| 3                 | Sri Lanka   | \$12,359          | 3.90%     | 76.5       | 9.80% | -53%              | .                    | 36    | 0.51   | 1.40% |          |
| 3                 | Thailand    | \$16,961          | 3.70%     | 76.4       | 11%   | -58%              | 26                   | 40    | 0.68   | 1.70% |          |
| 4                 | Malaysia    | \$28,247          | 3.80%     | 75.6       | 6.20% | -77%              | 369                  | 196   | 3.27   | 1.60% |          |

322  
 323  
 324 In table 1B, we compare Bangladesh with 10 other regional countries. Several  
 325 observations are relevant: health spending in Bangladesh is the lowest, life expectancy and

326 elderly as percentage of the population are within range of its neighbors. In terms of COVID-19  
 327 measures, Google’s Transit data show Bangladesh had higher values than only two of neighbors  
 328 Vietnam and Pakistan and for two different reasons. By the 99<sup>th</sup> day Thailand was registering  
 329 less than 50 cases a day and Nepal was registering less than 5 cases a day. Vietnam has already  
 330 reached its peak daily cases and thus was opening up its economy while Pakistan was still  
 331 experiencing exponential growth in daily cases as is Bangladesh. Total cases data indicate  
 332 Bangladesh has the highest rate of infections among its neighbors. The rate of deaths in  
 333 Bangladesh is second highest, highest being that of Pakistan.

**Table 2: COVID-19 Weekly Measures**

| Week Of Year | Last Day of Week | Daily Transit % Change From Baseline | Daily Tests-Max | Daily New Cases-Max | Daily Total Cases-Max |
|--------------|------------------|--------------------------------------|-----------------|---------------------|-----------------------|
| 1            | March 14, 2020   | 0%                                   | 0               | 0                   | 0                     |
| 2            | March 21, 2020   | -19%                                 | 49              | 7                   | 17                    |
| 3            | March 28, 2020   | -70%                                 | 106             | 9                   | 48                    |
| 4            | April 4, 2020    | -68%                                 | 434             | 5                   | 61                    |
| 5            | April 11, 2020   | -73%                                 | 1,184           | 112                 | 424                   |
| 6            | April 18, 2020   | -73%                                 | 2,190           | 341                 | 1,838                 |
| 7            | April 25, 2020   | -71%                                 | 3,686           | 503                 | 4,689                 |
| 8            | May 2, 2020      | -71%                                 | 5,827           | 641                 | 8,238                 |
| 9            | May 9, 2020      | -65%                                 | 6,244           | 790                 | 13,134                |
| 0            | May 16, 2020     | -56%                                 | 8,582           | 1,202               | 20,065                |
| 1            | May 23, 2020     | -62%                                 | 10,834          | 1,773               | 30,205                |
| 2            | May 30, 2020     | -62%                                 | 11,291          | 2,523               | 42,844                |
| 3            | June 6, 2020     | -46%                                 | 14,088          | 2,911               | 60,391                |
| 4            | June 13, 2020    | -45%                                 | 16,638          | 3,471               | 81,523                |
| 5            | June 16, 2020    | -37%                                 | 15,038          | 3,141               | 90,619                |

Source: ECDPC, Github and Google

334

335 Table 2 shows Bangladesh specific weekly data for transit, tests, new and total cases.  
 336 Noting that Bangladesh announced a general holiday on march 28, 2020 with an attempt to  
 337 increase levels of NPI, it appears NPI was most effective in Bangladesh in around middle of  
 338 April when the percentage decline in transit mobility was highest at around 70% but then

339 mobility has been increasing and the most dramatic increase coming in on first week of June  
340 with almost 20% increase in mobility. Data also shows significant increases in testing and new  
341 cases since mid-April from about 2,000 tests to about 15,000 tests a day and new cases increase  
342 from 300 to about 3,000 cases a day. Thus tests per day has increased 7 folds while new cases  
343 have increased by 10 folds.

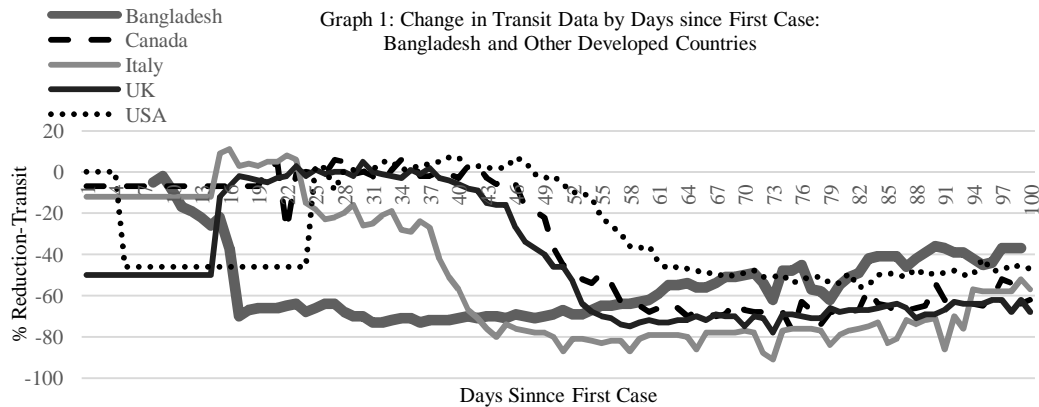

344

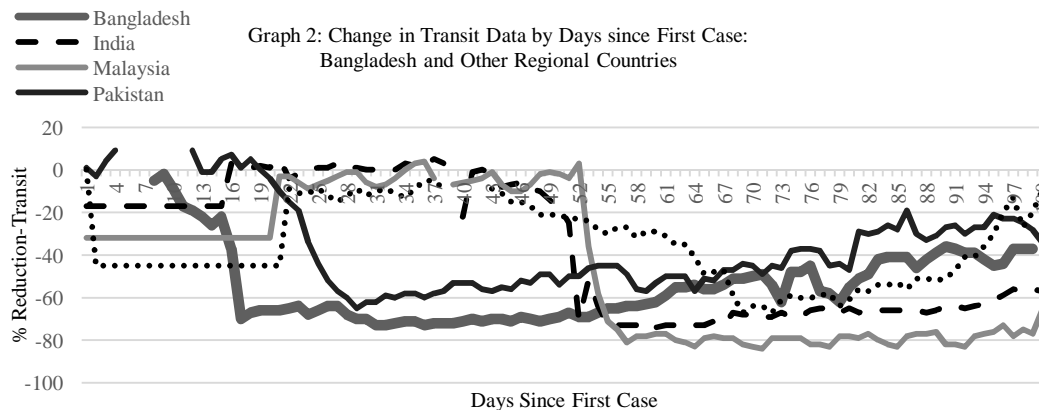

345

346 In Bangladesh, national lockdown was announced less than 20 days after the first case  
347 was identified. Many developed nations had sub-national lock downs and national lock downs  
348 was announced much later than that in Bangladesh. In Canada and United States, for instance,  
349 sub-national lock downs were announced and varied by Province/State. In these countries there  
350 was never a national lock down. In UK and Italy, national lockdown was announced long after  
351 the date of the first case. In Italy for instance first case was detected in January 31 and the  
352 national lockdown was announced on March 9, 38 days later (35). In the region Pakistan, India  
353 and Malaysia announced national lock downs well after the first case was detected. In Malaysia

354 targeted national lock down was announced about 50 days after the first case (36) and India  
355 national lock down was also announced 50 days after the first case (39). As the transit mobility  
356 data Graph 1 and Graph2 shows, Bangladesh experienced a significant drop in mobility well  
357 before other countries and the reduction was significant to about -70%. That reduction remained  
358 in place for about 40 days after which mobility tended to increase signaling decreases in NPI  
359 compliance. In most cases, this trend contrasts with other countries where the reduction remained  
360 in place for first 100 days.

Graph 3: New Cases Per Day Per Million Population  
Bangladesh and Other Developed Countries

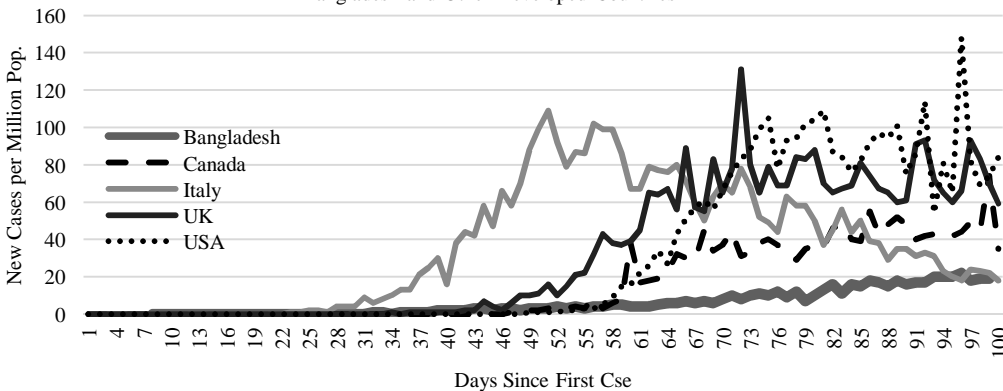

361

Graph 4: New Cases Per Day Per Million Population  
Bangladesh and Other Developed Countries

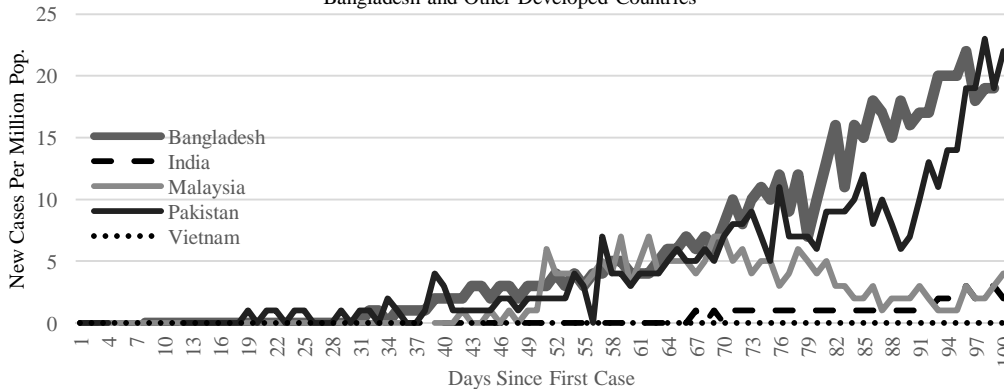

362

363 Trends in new cases per day per million population (Graph 3 and Graph 4) indicate that  
364 the cases in Bangladesh is still growing. When compared to regional countries, the levels in  
365 Bangladesh is significantly higher than other countries in the region. More importantly, this trend  
366 appear to be accelerating, where acceleration may have started between the 70<sup>th</sup>-80<sup>th</sup> days. This  
367 translated to calendar days between middle of May to end of May. Thus the announcement of  
368 lifting of lockdown on June 1 coincides with acceleration of new cases. It is for this reason that

369 we use May 30 as the cut-off point for pre-lockdown analysis. It is expected that projected  
370 number of cases in the future will be significantly higher if we use actuals cases as of June 16  
371 (post lockdown) versus projection using actuals thru May 30 (pre-lockdown). Further in certain  
372 models, the change in mobility between May 30 to June 16 can be used as proxy for reduction of  
373 NPI.

374 **Projection:**

375 Actual new and total cases as of June 16, 2020 were used for this study. As of that date,  
376 the epidemic has been in country for about 99 days since the first case and as of June 16, 2020  
377 there were about 90,000 cases with most recent moving 3-day average daily cases of about 3,100.  
378 The 'pre' period was defined as the period from date of first case to May 30, 2020 or about 80  
379 days. As of May 30, 2020, there about 43,000 total cases and daily new cases was about 2,500.

380

381 **SIR Model:**

382 Estimation using the SIR methodology, using actual cases as of June 16,2020,  
383 indicates that new cases will peak in around the middle of June and total cases will peak at  
384 about 194,527 and early phase of peaks in total cases will be reached around August, 2020.  
385 The epidemic is projected to end in December, 2020. The model assumes a contact rate of  
386 0.49, recovery/removal rate of 0.423, infection period of 2.4 days. The model reports a  
387 reproduction number or  $R_0$  of 1.013 and epidemic period of 292 days.

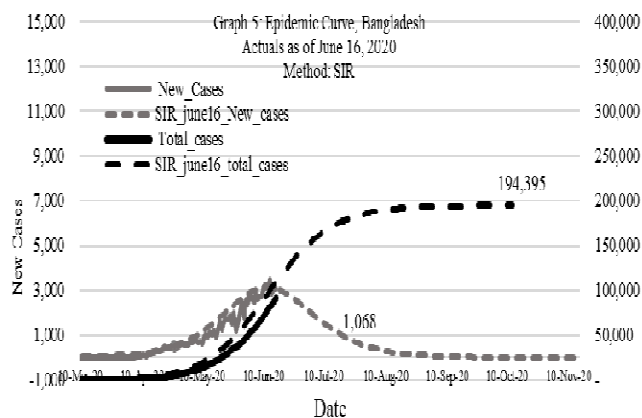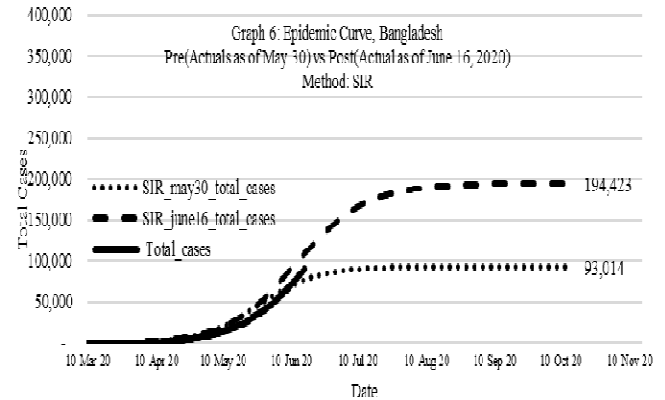

388



389 For the ‘pre’ period, the SIR model estimates total cases to peak at 93,000 in October,  
 390 2020. The model assumes a contact rate of 0.524, recovery/removal rate of 0.442, infection  
 391 period of 2.3 days. The model reports  $R_0$  of 1.018 and epidemic period of 233 days.

392 **Table 2B: Parameter and Key Estimates: SIR Model**

|                           |  |  | Actual as of |         |
|---------------------------|--|--|--------------|---------|
|                           |  |  | Jun-16       | May-30  |
| Number of observations    |  |  | 94           | 77      |
| Initial Infected          |  |  | 96,699       | 45,942  |
| Contact frequency         |  |  | 0.49         | 0.524   |
| Removal frequency         |  |  | 0.423        | 0.442   |
| Infectious period         |  |  | 2.4          | 2.3     |
| Final Suseptibles         |  |  | 550,053      | 222,864 |
| Final Infected            |  |  | 194,527      | 92,574  |
| Total epidemic duration   |  |  | 292          | 233     |
| Basic Reproduction number |  |  | 1.159        | 1.183   |
| Reproduction number       |  |  | 1.013        | 1.018   |
| End reproduction number   |  |  | 0.856        | 0.836   |

393  
 394 Thus most recent actual cases projects that the epidemic will continue to the end of  
 395 the year, reach about 194,000 cases. The lock down relaxation that came into effect first of  
 396 week of June may have resulted in doubling the number of total cases and extend the  
 397 epidemic by about 60 days.

398 Using the Gompertz method, projection results in 609,333 total cases by September,  
 399 2020. Daily new cases are estimated to peak around early August at about 6,500 a day.

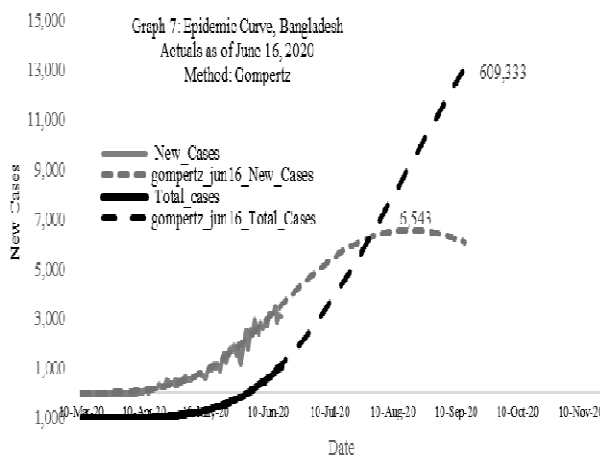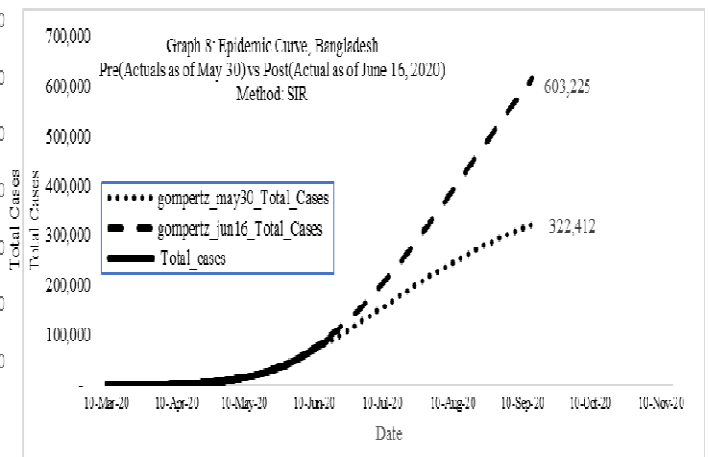

400  
 401 Quadratic Model:

402 Under the ‘quadratic’ modelling approach, regression is run using equation 4 above. In  
 403 this approach country level daily new cases per million is regressed on country specific time  
 404 measures such as days since 100<sup>th</sup> case and its square. The resulting parameters are then adjusted  
 405 to account for increased transit activity in Bangladesh using Google mobility data. The  
 406 relationship between Google mobility data and COVID-19 cases was explored by Yilmazkuday  
 407 (2020) who showed a strong relationship between mobility data and new cases. In the context of  
 408 Bangladesh the transit data showed as May 30,2020 the percentage change from baseline was  
 409 about -62% and that percentage increased -37% by June 16. Thus mobility increased by about  
 410 24%. This evidence is used to lower the value of a in equation 4 by multiplying by 0.76 and re-  
 411 calculating the number of projected new cases. These projected new cases are then further  
 412 adjusted to align with actual levels using factors noted in Table x.

**Table 2C: Parameter Estimates:  
 Quadratic Model**

| Parameter Estimates      |                    |       |        |
|--------------------------|--------------------|-------|--------|
| Variable                 | Parameter Estimate | P     | r >  t |
| Intercept                | .47272             | .0001 | <      |
| days                     | .75007             | .0001 | <      |
| days_sq                  | -0.00469           | .0001 | <      |
| R2                       |                    |       | .4%    |
| N                        |                    |       | 14,112 |
| Transit Factor           |                    |       | .7%    |
| Adj- Factor- New Cases   |                    |       | .6%    |
| Adj- Factor- Total Cases |                    |       | .5%    |
|                          |                    |       | .2%    |
|                          |                    |       | .9%    |

413

414 Regression results indicate that coefficient of days and days\_sq have the expected sign.  
 415 This means that number of new cases increases with days post the first 100 days and negative  
 416 sign on the days\_sq coefficient implies that new cases reaches a maximum on a specific level  
 417 value of day. Under the base regression, the estimated number of days to reach maximum of new  
 418 daily cases is about 90 days ( $.75/(2*0.004)=93.75$ ). Bangladesh is yet to achieve daily maximum;  
 419 plus recent relaxation of lockdowns is likely to extend the daily maximum longer. So to adjust  
 420 for that prospect, the coefficient was adjusted by the transit factor of 0.76.

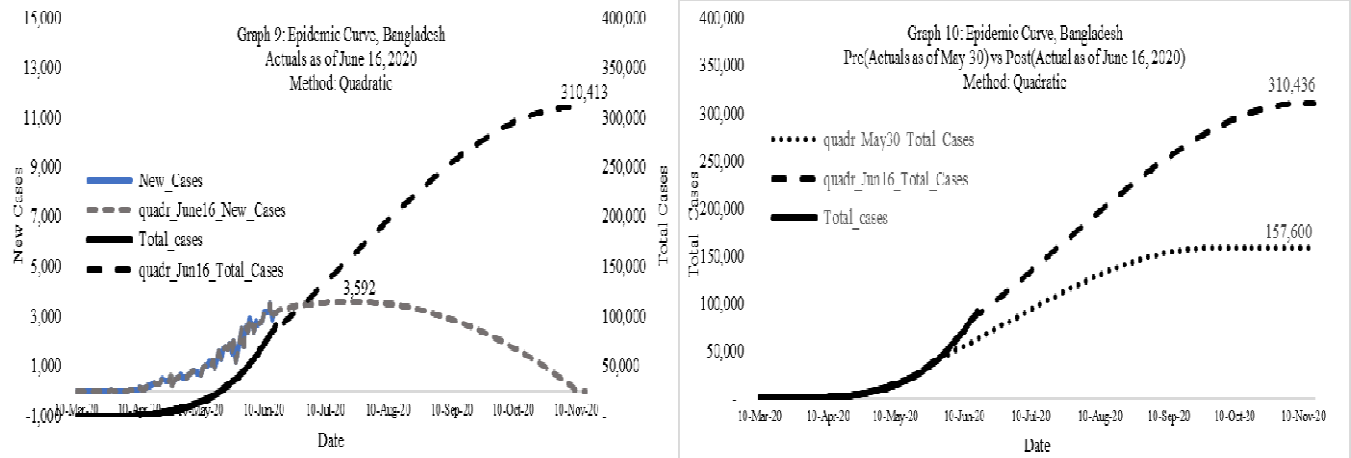

421

422 As Graphs 9 and 10 shows, the quadratic method shows that new cases is projected to  
423 peak around July-2020 at about 3,600 a day and total cases likely to peak around November-  
424 2020 at about 310,000 total cases. If the current case fatality holds to the end, total deaths is  
425 estimated to be about 4,000. Given that there is wide-spread community spread, even with the  
426 recently announced efforts of Red Zoning, total cases may continue to increase. Projected fatality  
427 levels may be under-estimated as current fatality numbers may be under reported and future case  
428 fatality rate may increase as a result of health care system will come increased pressure and will  
429 struggle to save lives.

430 Facebook Prophet Model (FB):

431 The Facebook Prophet approach results in daily cases to peak at about 4,800 around first  
432 week of July and total cases to peak around 388,000 in first week of September. Projected daily  
433 and total cases tracks very close to actual levels.

434 Using actuals as of May 30, the projection results in total cases to peak around the same  
435 time in September but the number of total cases would be significantly lower at about 247,000.

436

437

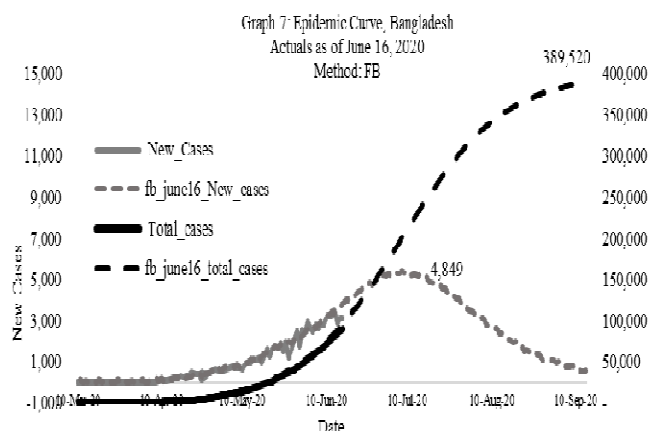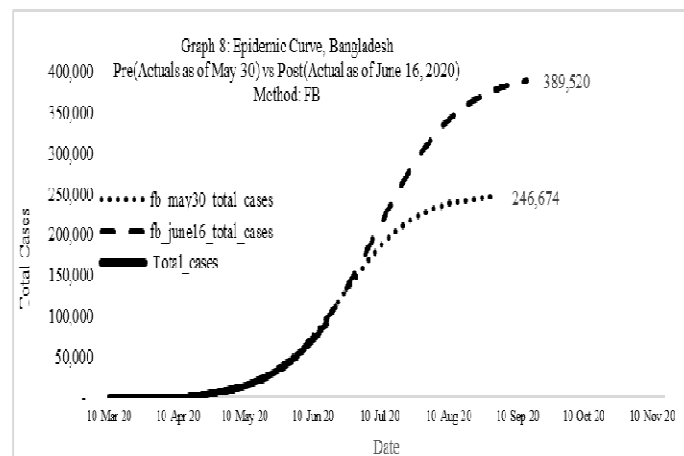

438

439

440 Comparison across all 4 models, as shown in Table 3, reveals that total cases may peak  
 441 between September to November and levels of cases may range from 194,000 to 615,000. Using  
 442 the most recent case fatality rate and assuming same rates remain throughout the epidemic, total  
 443 deaths may range from 2,600 to 8,200.

444

**Table 3: COVID-19 Epidemic Projection- Bangladesh**

| Method    | New Cases Peak | Total Cases Peak | Total Cases At Peak | Total Deaths |
|-----------|----------------|------------------|---------------------|--------------|
| SIR       | Jun-12-2020    | Oct-13-2020      | 194,423             | 2,592        |
| Gompertz  | Aug-17-2020    | Sep-14-2020      | 615,410             | 8,204        |
| Quadratic | Jul-25-2020    | Nov-04-2020      | 310,436             | 4,138        |
| Facebook  | Jul-08-2020    | Sep-14-2020      | 389,520             | 5,193        |

445

446 Comparison of NPI impact across the 4 methods is reflected through the difference  
 447 between projected cases as of June versus end of May, shown in Table 4. With NPI, projected  
 448 cases would be between 93,000 to 322,000; thus lifting of NPI may have resulted in increase of  
 449 COVID-19 cases by 58% to 109%.

450

**Table 4: COVID-19 Epidemic Projection- Bangladesh**

| Method    | Pre-Estimation | Current Estimation | NPI Impact | NPI Impact |
|-----------|----------------|--------------------|------------|------------|
|           | Total Cases    |                    | #          | %          |
| SIR       | 93,014         | 194,423            | 101,409    | 109%       |
| Gompertz  | 322,412        | 615,410            | 292,998    | 91%        |
| Quadratic | 157,600        | 310,436            | 152,836    | 97%        |
| Facebook  | 246,674        | 389,520            | 142,846    | 58%        |

451

452 **Policy Engagement:**

453 The outcome of these analytic exercises was shared with key public officials for  
454 considerations and they have been using it consistently. So far the researchers have provided to  
455 the Health Government officials in the form of Technical Brief. The last one being # 10 and this  
456 process is on going. Appendix A provides example of such a report.

457 It was proposed that such analysis would assist key policy and decision makers in charge  
458 of managing the COVID-19 pandemic. After several iterations, it was decided that the results of  
459 the SIR model and district level data highlighting areas of improvements and concerns would be  
460 created.

461 **Discussion**

462 All models projects that the current COVID-19 model may peak around the time frame  
463 towards end of the year. Total number of cases have a significant range multiple of 3, from about  
464 200,000 to about 600,000; although 3 of the models predicts total cases to be 390,000 or lower.  
465 The high range may reflect the uneven growth of cases since the start of the epidemic. Rate of  
466 infection spreading ranges from  $R_0$  of 1.006 to 1.02.

467 The trajectory of COVID-19 epidemic in Bangladesh also reflects a much longer period  
468 of infection, here the daily peak is expected to be in July, 4 months after the first case was  
469 detected. NPI impacts supports the idea that lifting of the NPI has had significant impact in  
470 increasing potential cases from about 60% to 100% higher.

471 This study has several limitations. The use of multiple models to predict the  
472 outcome of an epidemic in a single country may result in outcome that varies significantly from  
473 one another, thus increasing the level of uncertainty. Limited data availability of Bangladesh  
474 specific transmission and recovery rates forces us to select initial values that may not be  
475 appropriate. Time specific influential events such holidays, major climate events and sub-  
476 national events could not be captured in any of the models. Some of these events may extend the  
477 epidemic period. This study also does not take into account recent changes in policy such as  
478 assignment of red zone, lock down of neighborhoods, increases in contact tracing and other  
479 measures that government has taken to mitigate the spread of the virus. This study does not  
480 address the direct and indirect health effects of the COVID-19 epidemic. Future analysis could  
481 address these shortcomings.

482           There may also be a need to better understand and apply measures not directly captured  
483 in epidemiological reporting; we may need to include sociological and anthropological  
484 considerations in localities to better address the appropriateness of measures and methods in our  
485 modelling approach (37).

#### 486 **Conclusion**

487 Using multiple models, this study estimates the trajectory of the COVID-19 pandemic in  
488 Bangladesh. Results show a wide variation in the total number of cases may range from 200,000  
489 to 600,000 towards the end of the year. This paper also shows that NPI policies have significant  
490 impact on the intensity and length of the epidemic; suggesting that lifting of NOI may have  
491 extend the epidemic by 3 months and increase prevalence between 60 to 100%. Substantial  
492 uncertainty exist as the rate of transmission of the virus is unknown, public compliance with NPI  
493 efforts has been mixed and governments ability to enforce and sustain NPI policies is challenged  
494 due to the negative effects they have on economic life.

495 References

- 496 1. [https://www.who.int/emergencies/diseases/novel-coronavirus-2019/events-as-they-](https://www.who.int/emergencies/diseases/novel-coronavirus-2019/events-as-they-happen) happen. Accessed d June 16,  
497 2020
- 498 2. Lu J, Gu J, Li K, Xu C, Su W, Lai Z, et al. COVID-19 outbreak associated with air conditioning in restaurant,  
499 Guangzhou, China, 2020. *Emerg Infect Dis.* 2020 Jul [Accessed June 13,  
500 2020]. <https://doi.org/10.3201/eid2607.200764>
- 501 3. Verity, R., Okell, L. C., Dorigatti, I., Winskill, P., Whittaker, C., Imai, N., . . . Ferguson, N. M. (2020).  
502 Estimates of the severity of coronavirus disease 2019: A model-based analysis. *The Lancet Infectious*  
503 *Diseases*, 20(6), 669-677.
- 504 4. Arons, M. M., Hatfield, K. M., Reddy, S. C., Kimball, A., James, A., Jacobs, J. R., . . . Public Health–Seattle  
505 and King County and CDC COVID-19, Investigation Team. (2020). Presymptomatic SARS-CoV-2 infections  
506 and transmission in a skilled nursing facility. *The New England Journal of Medicine*, 382(22), 2081-2090.
- 507 5. Pascarella, G., Strumia, A., Piliago, C., Bruno, F., Del Buono, R., Costa, F., . . . Agrò, F. E. (2020). COVID-19  
508 diagnosis and management: A comprehensive review. *Journal of Internal Medicine*,
- 509 6. Chu, D. K., Akl, E. A., Duda, S., Solo, K., Yaacoub, S., Schünemann, H.J., . . . COVID-19 Systematic Urgent  
510 Review Group Effort (SURGE), study authors. (2020). Physical distancing, face masks, and eye protection to  
511 prevent person-to-person transmission of SARS-CoV-2 and COVID-19: A systematic review and meta-  
512 analysis. *The Lancet (British Edition)*,
- 513 7. Cheng, V., Wong, S., Chen, J., Yip, C., Chuang, V., Tsang, O., . . . Yuen, K. (2020). Escalating infection  
514 control response to the rapidly evolving epidemiology of the coronavirus disease 2019 (COVID-19) due to  
515 SARS-CoV-2 in Hong Kong. *Infection Control & Hospital Epidemiology*, 41(5), 493-498.  
516 doi:10.1017/ice.2020.58.
- 517 8. Wu, J. T., Leung, K., & Leung, G. M. (2020). Nowcasting and forecasting the potential domestic and  
518 international spread of the 2019-nCoV outbreak originating in wuhan, china: A modelling study. *The Lancet*,  
519 395(10225), 689-697.
- 520 9. [https://www.imperial.ac.uk/mrc-global-infectious-disease-analysis/covid-19/report-9-impact-of-npis-on-covid-](https://www.imperial.ac.uk/mrc-global-infectious-disease-analysis/covid-19/report-9-impact-of-npis-on-covid-19/)  
521 [19/..](https://www.imperial.ac.uk/mrc-global-infectious-disease-analysis/covid-19/report-9-impact-of-npis-on-covid-19/)accessed June 10,2020
- 522 10. IHME COVID-19 health service utilization forecasting team. Forecasting COVID-19 impact on hospital bed-  
523 days, ICU-days, ventilator days and deaths by US state in the next 4 months. *MedRxiv*. 26 March 2020.  
524 doi:10.1101/2020.03.27.20043752.
- 525 11. Tuite, A. R., Fisman, D. N., & Greer, A. L. (2020). Mathematical modelling of COVID-19 transmission and  
526 mitigation strategies in the population of ontario, canada. *CMAJ : Canadian Medical Association Journal =*  
527 *Journal De l'Association Medicale Canadienne*, 192(19), E497-E505.
- 528 12. Flaxman, S., Mishra, S., Gandy, A., Unwin, H. J., Mellan, T. A., Coupland, H., . . . Imperial College COVID-  
529 19, R. T. (2020). Estimating the effects of non-pharmaceutical interventions on COVID-19 in europe. *Nature*  
530 (London),

- 531 13. <http://southasiajournal.net/covid-19-without-government-action-over-500000-may-die-in-bangladesh/> accessed  
532 June 10, 2020
- 533 14. Chowdhury, R., Heng, K., Shawon, M. S. R., Goh, G., Okonofua, D., Ochoa-Rosales, C., . . . The Global  
534 Dynamic Interventions Strategies for COVID-19, Collaborative Group. (2020). Dynamic interventions to control  
535 COVID-19 pandemic: A multivariate prediction modelling study comparing 16 worldwide countries. *European*  
536 *Journal of Epidemiology*, 35(5), 389-399.
- 537 15. <https://www.thedailystar.net/frontpage/news/fighting-coronavirus-govt-shuts-down-offices-10-days-1884928>,  
538 (accessed June 10, 2020)
- 539 16. <https://www.newagebd.net/article/103078/govt-imposes-10-day-ban-on-public-transport-from-march-26>,  
540 (accessed June 10, 2020)
- 541 17. [https://www.aljazeera.com/news/2020/04/bangladesh-garment-workers-return-work-lockdown-](https://www.aljazeera.com/news/2020/04/bangladesh-garment-workers-return-work-lockdown-200427091544354.html)  
542 [200427091544354.html](https://www.aljazeera.com/news/2020/04/bangladesh-garment-workers-return-work-lockdown-200427091544354.html) (accessed June 10, 2020)
- 543 18. [https://www.dhakatribune.com/bangladesh/2020/05/18/thousands-head-home-for-eid-lockdown-](https://www.dhakatribune.com/bangladesh/2020/05/18/thousands-head-home-for-eid-lockdown-notwithstanding)  
544 [notwithstanding](https://www.dhakatribune.com/bangladesh/2020/05/18/thousands-head-home-for-eid-lockdown-notwithstanding) (accessed June 10, 2020)
- 545 19. [https://tbsnews.net/coronavirus-chronicle/covid-19-bangladesh/country-still-struggling-cope-covid-19-testing-](https://tbsnews.net/coronavirus-chronicle/covid-19-bangladesh/country-still-struggling-cope-covid-19-testing-needs-91177)  
546 [needs-91177](https://tbsnews.net/coronavirus-chronicle/covid-19-bangladesh/country-still-struggling-cope-covid-19-testing-needs-91177) (accessed June 10, 2020)
- 547 20. <https://www.newagebd.net/article/105108/bangladesh-govt-to-recruit-2000-docs-6000-nurses-immediately>  
548 (accessed June 10, 2020)
- 549 21. [https://www.thehindu.com/news/international/coronavirus-bangladesh-builds-huge-field-](https://www.thehindu.com/news/international/coronavirus-bangladesh-builds-huge-field-hospital/article31585713.ece)  
550 [hospital/article31585713.ece](https://www.thehindu.com/news/international/coronavirus-bangladesh-builds-huge-field-hospital/article31585713.ece); [https://tbsnews.net/coronavirus-chronicle/covid-19-bangladesh/field-hospital-](https://tbsnews.net/coronavirus-chronicle/covid-19-bangladesh/field-hospital-brings-relief-ctg-covid-19-patients-81766)  
551 [brings-relief-ctg-covid-19-patients-81766](https://tbsnews.net/coronavirus-chronicle/covid-19-bangladesh/field-hospital-brings-relief-ctg-covid-19-patients-81766) accessed June 10, 2020
- 552 22. [https://reliefweb.int/report/bangladesh/bangladesh-cyclone-amphan-operation-update-report-dref-operation-n-](https://reliefweb.int/report/bangladesh/bangladesh-cyclone-amphan-operation-update-report-dref-operation-n-mdrbd024)  
553 [mdrbd024](https://reliefweb.int/report/bangladesh/bangladesh-cyclone-amphan-operation-update-report-dref-operation-n-mdrbd024) (accessed June 10, 2020)
- 554 23. [https://home.kpmg/xx/en/home/insights/2020/04/bangladesh-government-and-institution-measures-in-response-](https://home.kpmg/xx/en/home/insights/2020/04/bangladesh-government-and-institution-measures-in-response-to-covid.html)  
555 [to-covid.html](https://home.kpmg/xx/en/home/insights/2020/04/bangladesh-government-and-institution-measures-in-response-to-covid.html). (accessed June 10, 2020)
- 556 24. Kermack, W. O., & McKendrick, A. G. (1927). A contribution to the mathematical theory of  
557 epidemics. *Proceedings of the Royal Society of London. Series A, Containing Papers of a Mathematical and*  
558 *Physical Character*, 115(772), 700-721.
- 559 25. [https://www.mathworks.com/matlabcentral/fileexchange/74658-fitviruscovid19?s\\_tid=prof\\_contriblnk](https://www.mathworks.com/matlabcentral/fileexchange/74658-fitviruscovid19?s_tid=prof_contriblnk)  
560 (accessed June 10, 2020)
- 561 26. Deming, J. (1957). Application of the gompertz curve to the observed pattern of growth in length of 48  
562 individual boys and girls during the adolescent cycle of growth. *Human Biology*, 29(1), 83-122.
- 563 27. Liu, W., Tang, S., & Xiao, Y. (2015). Model selection and evaluation based on emerging infectious disease data  
564 sets including A/H1N1 and ebola. *Computational and Mathematical Methods in Medicine*, 2015, 207105-14.
- 565 28. Torrealba-Rodriguez, O., Conde-Gutiérrez, R. A., & Hernández-Javier, A. L. (2020). Modeling and prediction  
566 of COVID-19 in Mexico applying mathematical and computational models. *Chaos, Solitons and Fractals*, 138,  
567 109946.



- 568 29. <https://facebook.github.io/prophet/> ( accessed June 10, 2020)
- 569 30. <https://www.medrxiv.org/content/medrxiv/early/2020/05/14/2020.05.10.20097295.full.pdf> (accessed, June 10,  
570 2020)
- 571 31. World Bank. Health, Nutrition, and Population Statistics. [http://data.worldbank.org/data-catalog/health-](http://data.worldbank.org/data-catalog/health-nutrition-and-population-statistics)  
572 [nutrition-and-population-statistics.](http://data.worldbank.org/data-catalog/health-nutrition-and-population-statistics)
- 573 32. [https://www.ecdc.europa.eu/en/publications-data/download-todays-data-geographic-distribution-covid-19-](https://www.ecdc.europa.eu/en/publications-data/download-todays-data-geographic-distribution-covid-19-cases-worldwide)  
574 [cases-worldwide](https://www.ecdc.europa.eu/en/publications-data/download-todays-data-geographic-distribution-covid-19-cases-worldwide) (Accessed June 17, 2020 )
- 575 33. <https://github.com/owid/covid-19-data/blob/master/public/data/testing/covid-testing.xlsx> (Accessed June 17,  
576 2020)
- 577 34. <https://www.google.com/covid19/mobility/> (Accessed June 17, 2020)
- 578 35. [https://www.axios.com/italy-coronavirus-timeline-lockdown-deaths-cases-2adb0fc7-6ab5-4b7c-9a55-](https://www.axios.com/italy-coronavirus-timeline-lockdown-deaths-cases-2adb0fc7-6ab5-4b7c-9a55-bc6897494dc6.html)  
579 [bc6897494dc6.html](https://www.axios.com/italy-coronavirus-timeline-lockdown-deaths-cases-2adb0fc7-6ab5-4b7c-9a55-bc6897494dc6.html)
- 580 36. Shah, A. U. M., Safri, S. N. A., Thevadas, R., Noordin, N. K., Rahman, A. A., Sekawi, Z., . . . Sultan, M. T. H.  
581 (2020). COVID-19 outbreak in malaysia: Actions taken by the malaysian government. *International Journal of*  
582 *Infectious Diseases*, 97, 108-116.
- 583 37. Rhodes, T., Lancaster, K., Lees, S., & Parker, M. (2020). Modelling the pandemic: Attuning models to their  
584 contexts. *BMJ Global Health*, 5(6), e002914.
- 585 38. <https://thewire.in/covid-19-india-timeline> (accessed July 3, 2020)
- 586 39. [https://www.thestar.com/politics/federal/2020/05/07/82-of-canadas-covid-19-deaths-have-been-in-long-term-](https://www.thestar.com/politics/federal/2020/05/07/82-of-canadas-covid-19-deaths-have-been-in-long-term-care.html)  
587 [care.html](https://www.thestar.com/politics/federal/2020/05/07/82-of-canadas-covid-19-deaths-have-been-in-long-term-care.html), <https://www.nytimes.com/interactive/2020/us/coronavirus-nursing-homes.html>  
588 (accessed July 3, 2020)
- 589



591

592 **Appendix A:**

593

**Technical Briefing #8**

594

June 16, 2020

595

596 Estimation of the number of potential infected cases as a result of the COVID-19  
597 pandemic in Bangladesh<sup>2</sup>

598

599 **Note: IEDCR data (national level) used as of June 16, 2020<sup>3</sup> ; since district level data is not reliable as  
600 they stand, no district level analysis is done**

601 **A. Purpose:**

602 Purpose of this document is to provide technical background behind the COVID-19 case projections  
603 for Bangladesh.

604 **B. Projection:**

605 This work tries to use publicly available data of IEDCR to estimate the total number of cases over the  
606 coming days for Bangladesh

607 **C. Methodology & Results:**

608 Several modeling approaches are used to understand the pattern and to make projections. These  
609 are:

610 ✓ SIR model

611 ✓ Modeling using forecasting tools developed by Facebook analytics team.

612

613 **D. Findings**

614

615 **D.1. Findings from SIR MODEL**

<sup>2</sup> **Technical Team:**

Shafiun Nahin Shimul, PhD, Institute of Health Economics, University of Dhaka & member Soho-Joddha  
Mofakhar Hussain, PhD, University of Toronto, Canada & member Soho-Joddha

Dr. Abu Jamil Faisel, Public Health Expert Advisor, DGHS, MOHFW & member Soho-Joddha

Syed Abdul Hamid, PhD, Institute of Health Economics, University of Dhaka & member Soho-Joddha

<sup>3</sup> for up to date projection and more results visit <https://sites.google.com/site/shafiunihe/recent-work-on-covid-19>

616

617 SIR Model: We used the real data provided by IEDCR to estimate the parameters required for SIR model,  
618 and the following graphs provides the results from that model.

619 **Interpretation of the findings**

620 **Top graph:** Indicates the actual and projected cases. The top graph is illustrated with three colours. Pink  
621 color indicates the danger zone and infection will continue until we reach yellow zone when growth  
622 expected to steady for while until it reaches in the green zone i.e. the graph is reaching plateau. This  
623 graph says that if the current rate continues, our infection will grow until the end of July, then it may get  
624 stable (grow but at lower rate) for about three to four weeks until early September and then slowed  
625 down. Epidemic will continue until the end of the year, at least.

626

627 **Bottom graph:** The bottom shows the growth factors. We would like to the region where the growth  
628 factor is less than 1, which may not happen until the end of July, if the current rate continues.

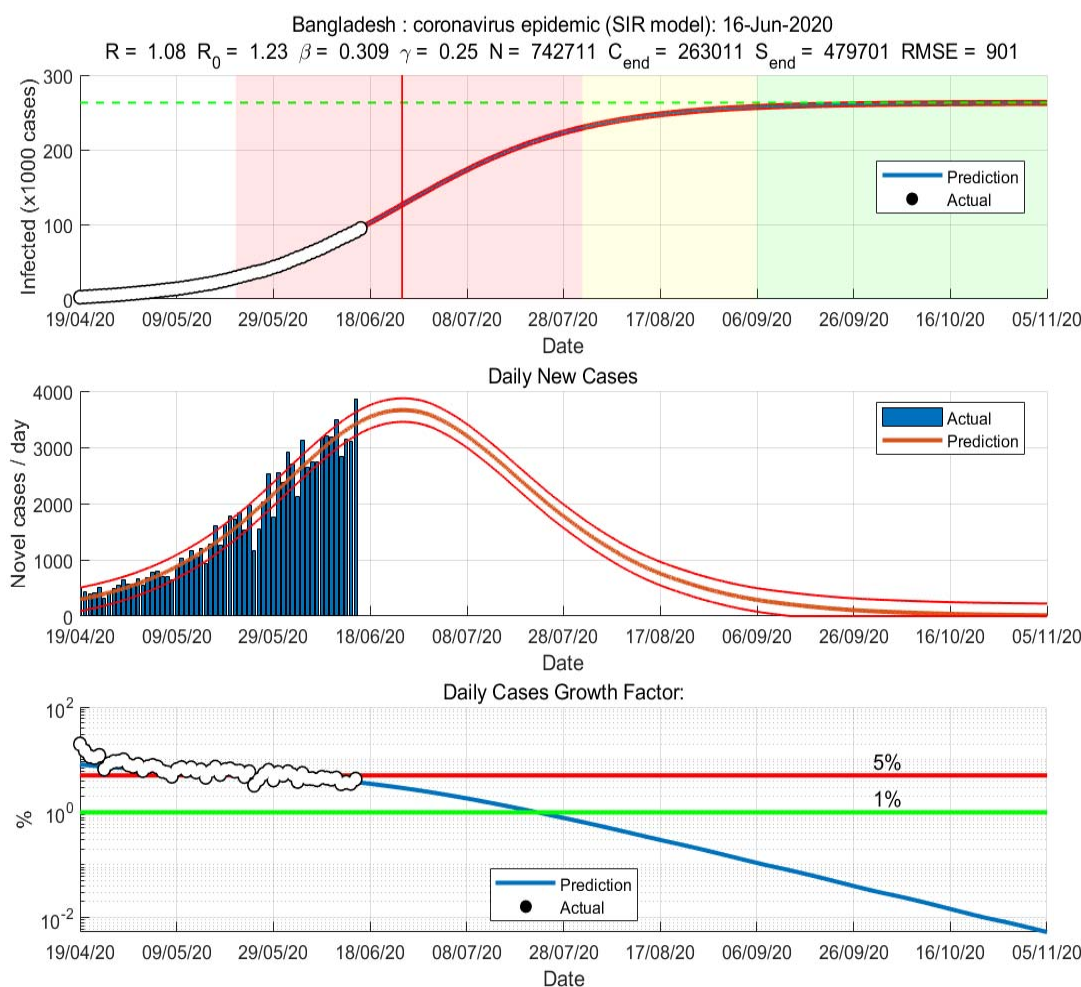

629

630 **D2. Findings from Time Series and Forecasting Tools of FB**

631 The detail findings of time series model and SIGMOID Curve (Logistic and Gompertz Distribution) are not  
 632 shown here. Gompertz distribution is less restrictive in terms of value of parameters it can adopt and so  
 633 this is very likely situation. SIR model seems to draw same conclusion as the results from Gompertz  
 634 distribution-so it is not reported. Facebook Analytic Tool is mostly like case given that everything is open  
 635 now, and actual cases might be even higher. This model predicts the we may reach at pick by mid July  
 636 with 5000-6000 daily new cases, however, it may even shift to the right with more number of cases. The  
 637 following line charts provides likely scenario of Bangladesh. Right hand size axis shows total cases, and  
 638 the left side axis shows new cases. Purple line shows predicted new cases, and organize bar shows  
 639 predicted total.

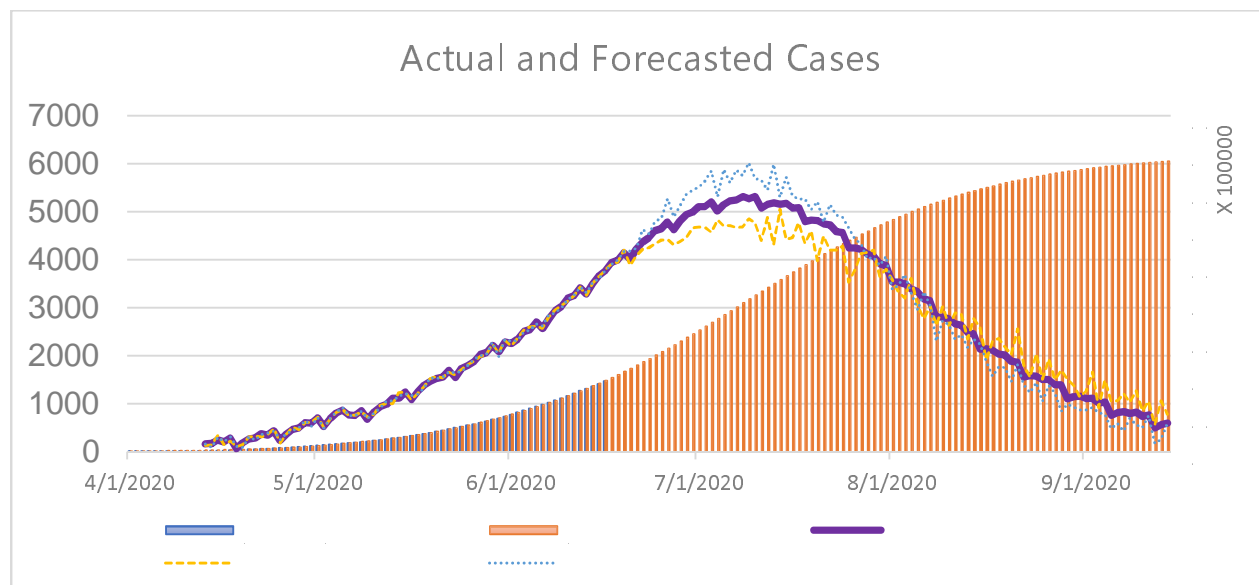

640

641 **E. Impact of economy opening**

642

643 Since the economy has opened, we have more contacts and so the rate of transmission has also increased. This can be easily seen from the analysis

643

|                              |                    |  | Until May 30                                                                        | After May 30 (economy opening)                           |
|------------------------------|--------------------|--|-------------------------------------------------------------------------------------|----------------------------------------------------------|
| <b>Projected Peak</b>        |                    |  | Mid-End of June                                                                     | Mid-End of July (may even shift to the right)            |
| <b>Projected cases (max)</b> | <b>new daily</b>   |  | 2500-3000                                                                           | 5000-6000                                                |
| <b>Projected (June 30)</b>   | <b>total cases</b> |  | 1,23,000                                                                            | 1,54,000-161,000                                         |
| <b>Projected (July 31)</b>   | <b>total cases</b> |  | 1,72,000                                                                            | 290,000-3,22,000                                         |
| <b>Projected (Maximum)</b>   | <b>total cases</b> |  | 2,00,000-2,50,000 (end of October)                                                  | 3,60,000-3,85,000 (by end of Aug only and will continue) |
| <b>Conclusion</b>            |                    |  | <b>Lifting lockdown has dramatically changed our chances for massive infections</b> |                                                          |

644

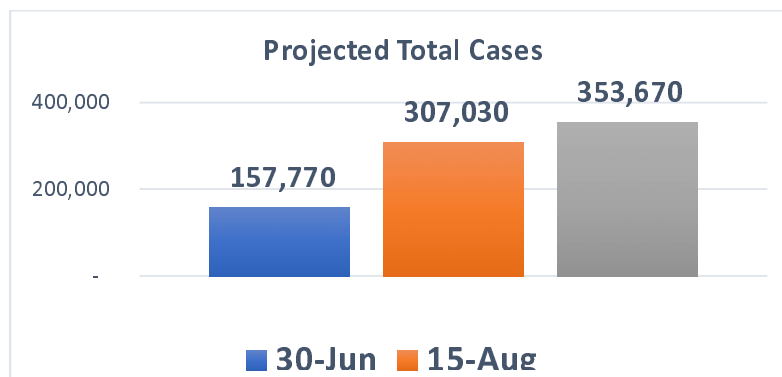

645

## 646 F. Caution

647 New few days are very crucial. Infection has grown drastically after economy has opened. We have  
648 only 15 days after lockdown lifting, so complete picture yet to be seen.

649

## 650 G. Conclusion

651 Bangladesh's condition is now in very risky. If social distancing is maintained and people do not  
652 follow the precautionary measures, Bangladesh can next epic-center of the world like Brazil or  
653 Russia, if not the USA.

654

## 655 References

656 1 <http://www.euro.who.int/en/health-topics/health-emergencies/coronavirus-covid-19/news/news/2020/3/who-announces-covid-19-outbreak-a-pandemic>

657 2. <https://academic.oup.com/itm/article/27/2/taaa021/5735319>

658 3 <https://www.imperial.ac.uk/mrc-global-infectious-disease-analysis/covid-19/report-9-impact-of-npis-on-covid-19/>

659 4 [https://papers.ssrn.com/sol3/Papers.cfm?abstract\\_id=3561560](https://papers.ssrn.com/sol3/Papers.cfm?abstract_id=3561560)

660 5. <https://ddi.sutd.edu.sg/>

661 6. <https://www.mathworks.com/matlabcentral/profile/authors/3576565-milan-batista>

662  
663

664

665
